# Supplementary material
Source: HighWire-hosted journal article supplement (https://bmjopen.bmj.com/content/9/6/e027036)
Supplement: inline-supplementary-material-1 [file inline-supplementary-material-1.pdf]

|        |        | Pre-OP→ 1 <sup>st</sup> month |        |          | 1 <sup>st</sup> month→ 3 <sup>rd</sup> month |        |          | 3 <sup>rd</sup> month→ 6 <sup>th</sup> month |        |          |
|--------|--------|-------------------------------|--------|----------|----------------------------------------------|--------|----------|----------------------------------------------|--------|----------|
|        |        | CNS                           | No CNS | Drop-out | CNS                                          | No CNS | Drop-out | CNS                                          | No CNS | Drop-out |
| OP     | CNS    | 5                             | 7      | 1        | 5                                            | 8      | 3        | 4                                            | 3      | 1        |
|        | No CNS | 11                            | 54     | 50       | 3                                            | 38     | 20       | 4                                            | 31     | 17       |
| Non-OP | CNS    | 7                             | 10     | 6        | 5                                            | 7      | 5        | 3                                            | 4      | 6        |
|        | No CNS | 10                            | 50     | 45       | 7                                            | 35     | 18       | 8                                            | 27     | 12       |
